# Supplementary material for: Evolutionary engineered Candida intermedia exhibits improved xylose utilization and robustness to lignocellulose-derived inhibitors and ethanol
Source: Springer Nature journal article supplement (doi:10.1007/s00253-018-9528-x), 2018-11-29
Supplement: MOESM1 [file 253_2018_9528_MOESM1_ESM.pdf]

1 **Applied Microbiology and Biotechnology**

2

3 **Evolutionary engineered *Candida intermedia* exhibits**  
4 **improved xylose utilization and robustness to lignocellulose-**  
5 **derived inhibitors and ethanol**

6

7 **Antonio D. Moreno<sup>1,2</sup>, Antonella Carbone<sup>1</sup>, Rosita Pavone<sup>1</sup>, Lisbeth Olsson<sup>1\*</sup> and Cecilia Geijer<sup>1</sup>**

8 *<sup>1</sup>Chalmers University of Technology, Department of Biology and Biological Engineering, Division of*  
9 *Industrial Biotechnology, Gothenburg, Sweden*

10 *<sup>2</sup>CIEMAT, Department of Energy, Biofuels Unit, Madrid, Spain*

11

12

13

14 \*Correspondence to: Lisbeth Olsson, Chalmers University of Technology, Department of Biology and  
15 Biological Engineering, Division of Industrial Biotechnology, SE-41296, Gothenburg, Sweden

16 E-mail: lisbeth.olsson@chalmers.se

17 Phone: + 46 31 772 38 05

18

19 **Supplementary Information**

20 **Figure S1**

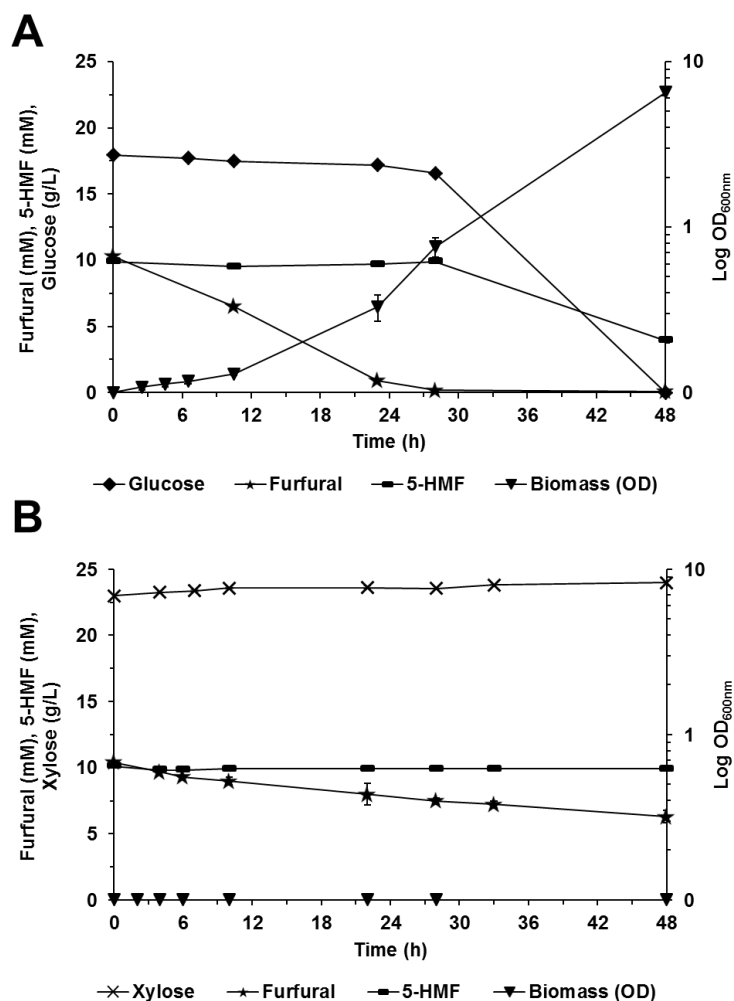

21

22 **Figure S1.** Effect of the furan derivatives furfural and 5-hydroxymethylfurfural (5-  
 23 HMF) on *C. intermedia* strain CBS 141442 growing in mineral media with (A) glucose  
 24 (MMD) and (B) xylose (MMX) as a sole carbon source.

25

26 Methodology

27 The ability of *C. intermedia* to tolerate and convert furfural and 5-  
 28 hydroxymethylfurfural (5-HMF) was evaluated in MMD or MMX supplemented with  
 29 10 mM furfural (1.0 g/L) and 10 mM 5-HMF (1.3 g/L). Cells growing in the  
 30 exponential phase in MMD or MMX were transfer to 50 mL of the corresponding test  
 31 medium to a final OD<sub>600nm</sub> of 0.1. Cultures were then incubated in an orbital shaker at  
 32 30 °C and 150 rpm for 48 h. Samples were withdrawn periodically to monitor the  
 33 concentrations of sugars, furfural and 5-HMF.

34 **Figure S2**

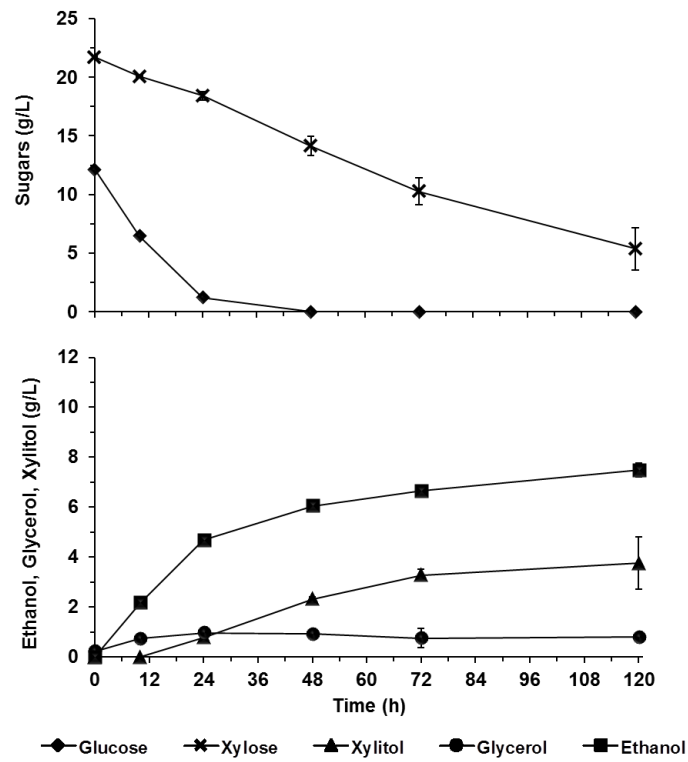

35

36 **Figure S2.** Fermentation of 50% (v/v) hydrolysate by the intermediate evolved  
37 population *C. intermedia* EVO 1.

38
